# Supplementary material for: Novel naphthoquinone derivatives and evaluation of their trypanocidal and leishmanicidal activities
Source: Royal Society of Chemistry journal article supplement (doi:10.1039/c4ob01869a), 2014-10-14
Supplement: c4ob01869a1.pdf [file c4ob01869a1.pdf]

## Electronic Supplementary Information

### **Novel naphthoquinone derivatives and evaluation of their trypanocidal and leishmanicidal activities**

Aline Alves dos Santos Naujorks<sup>a</sup>, Adriano Olímpio da Silva<sup>b</sup>, Rosangela da Silva Lopes<sup>b</sup>, Sérgio de Albuquerque<sup>c</sup>, Adilson Beatriz<sup>b</sup>, Maria Rita Marques<sup>d</sup>, Dênis Pires de Lima<sup>b\*</sup>

<sup>a</sup>Programa de Pós-Graduação em Farmácia, Centro de Ciências Biológicas e da Saúde, Universidade Federal de Mato Grosso do Sul, 79080-190, Campo Grande, MS, Brazil.

<sup>b</sup>Instituto de Química (LP4), Universidade Federal de Mato Grosso do Sul, 79074-460, Campo Grande, MS, Brazil.

<sup>c</sup>Departamento de Análises Clínicas, Toxicológicas e Bromatológicas, Faculdade de Ciências Farmacêuticas de Ribeirão Preto, USP, 14040-930, Ribeirão Preto, SP, Brazil.

<sup>d</sup>Centro de Ciências Biológicas e da Saúde, Laboratório de Bioquímica, Universidade Federal de Mato Grosso do Sul, 79070-900, Campo Grande, MS, Brazil.

\*Corresponding author: D. P. de Lima, Instituto de Química, Universidade Federal de Mato Grosso do Sul, Av. Filinto Müller 1555, CEP 79074-460, Campo Grande-MS, Brazil; +55-67-33453676;  
E-mail: denis.lima@ufms.br

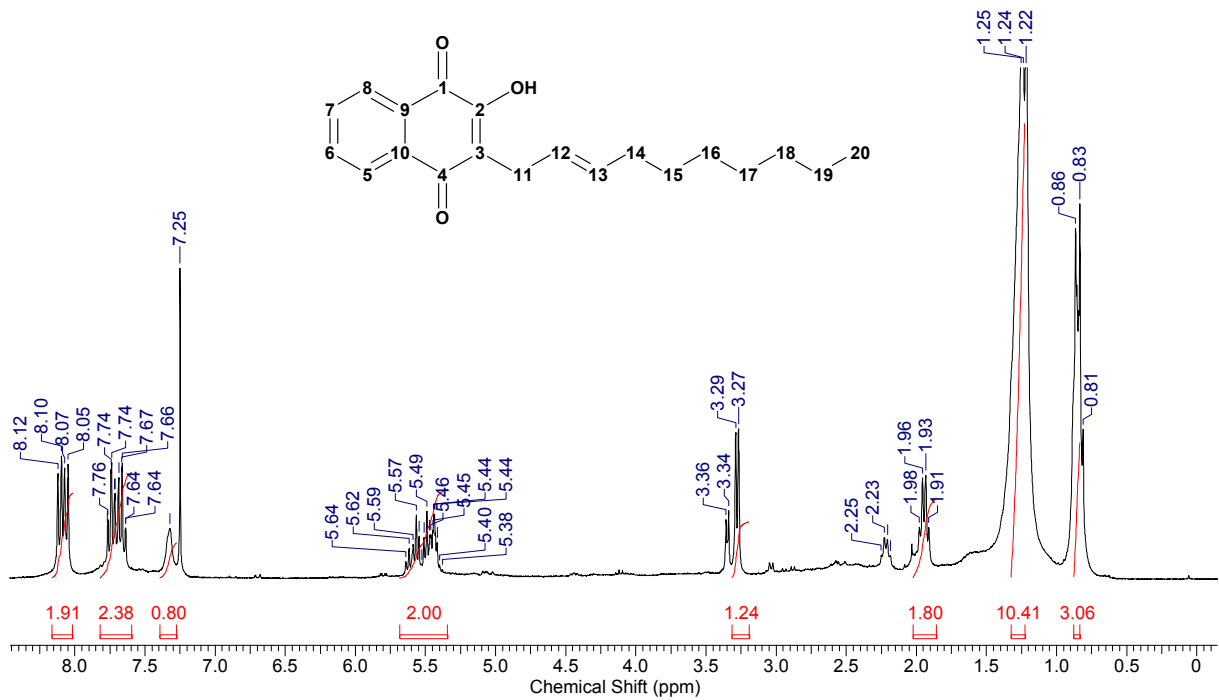

<sup>1</sup>H NMR (300 MHz, CDCl<sub>3</sub>) compound **8a**.

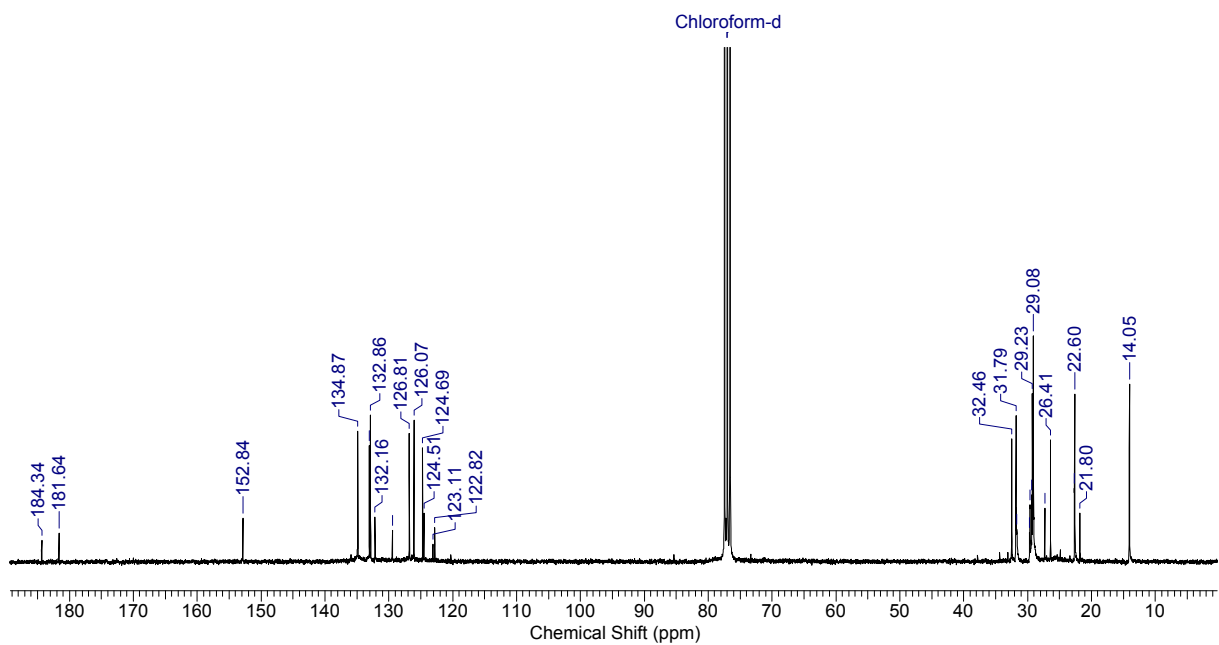

<sup>13</sup>C NMR (300 MHz, CDCl<sub>3</sub>) compound **8a**.

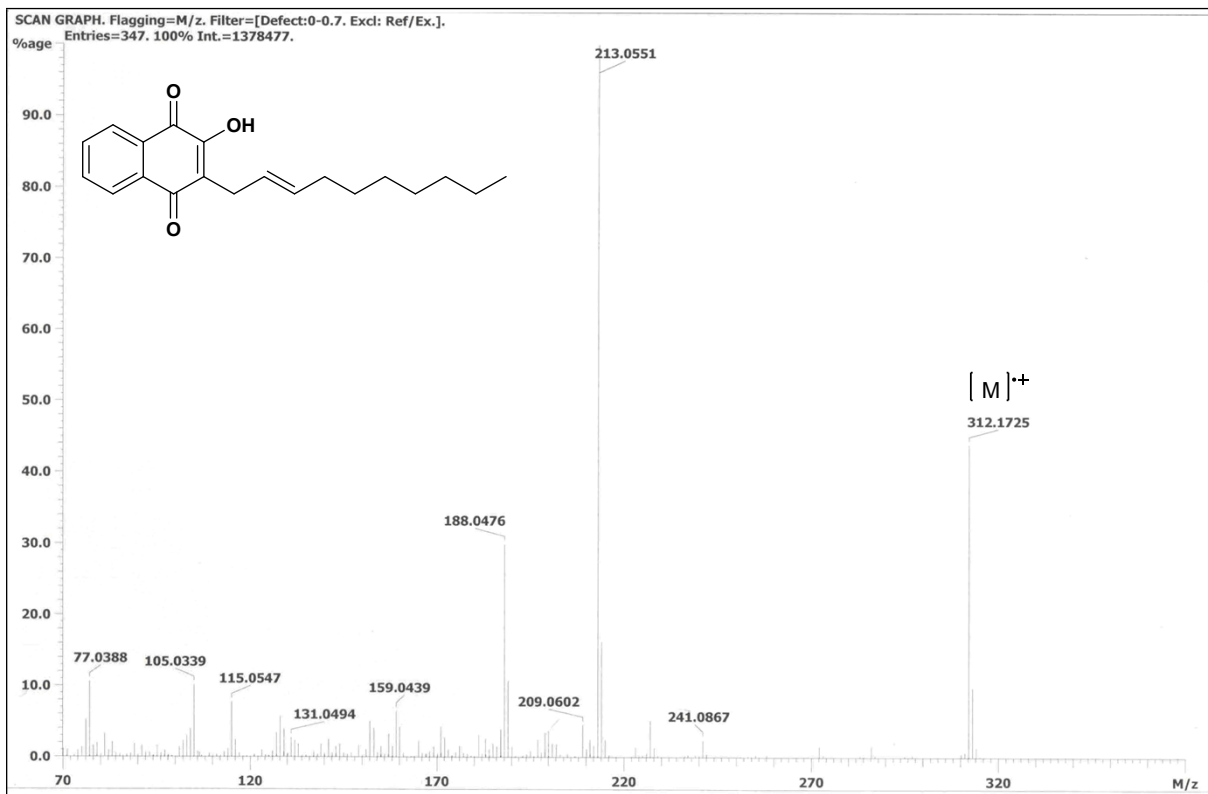

HRMS (EI) compound **8a**.

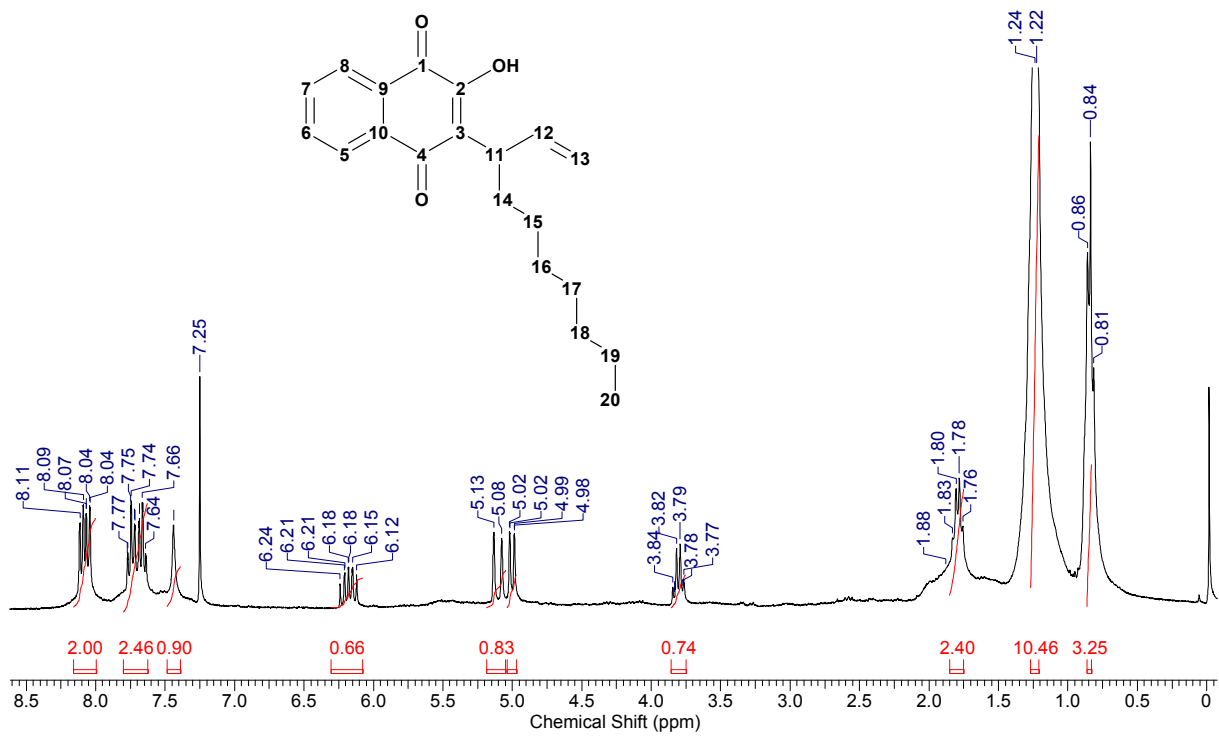

$^1\text{H}$  NMR (300 MHz,  $\text{CDCl}_3$ ) compound **8b**.

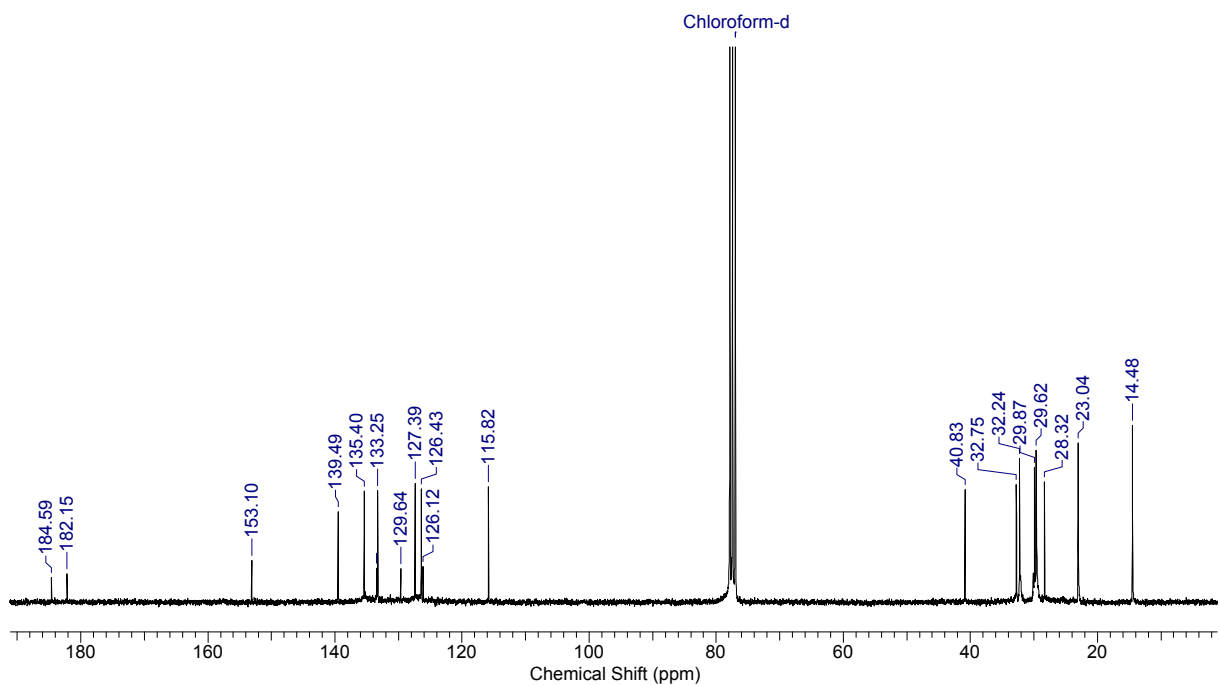

$^{13}\text{C}$  NMR (300 MHz,  $\text{CDCl}_3$ ) compound **8b**.

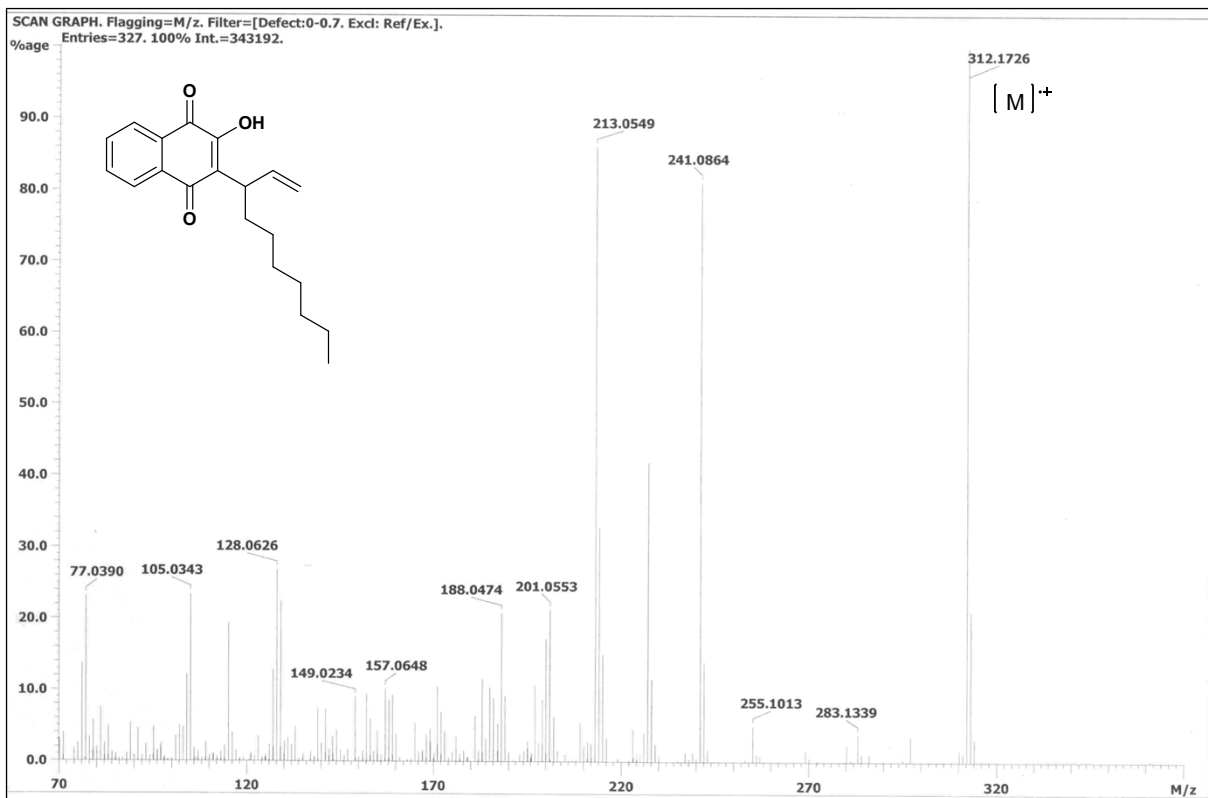

HRMS (EI) compound **8b**.

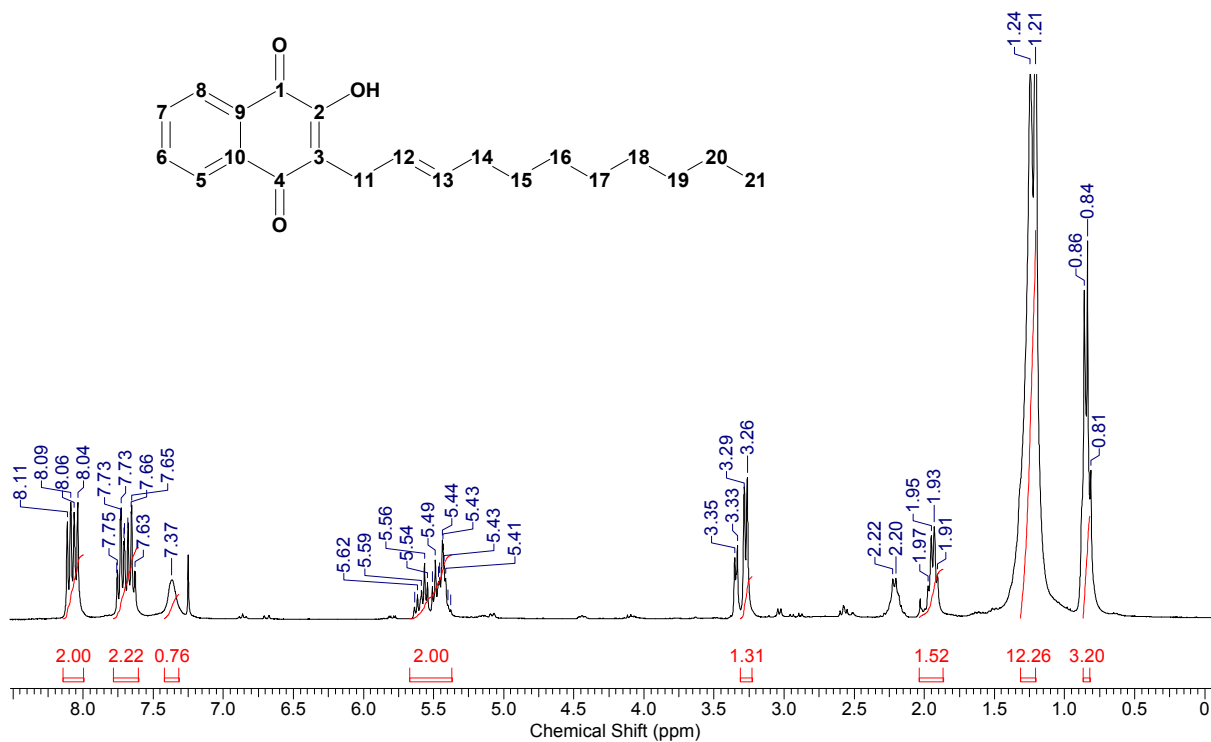

<sup>1</sup>H NMR (300 MHz, CDCl<sub>3</sub>) compound **9a**.

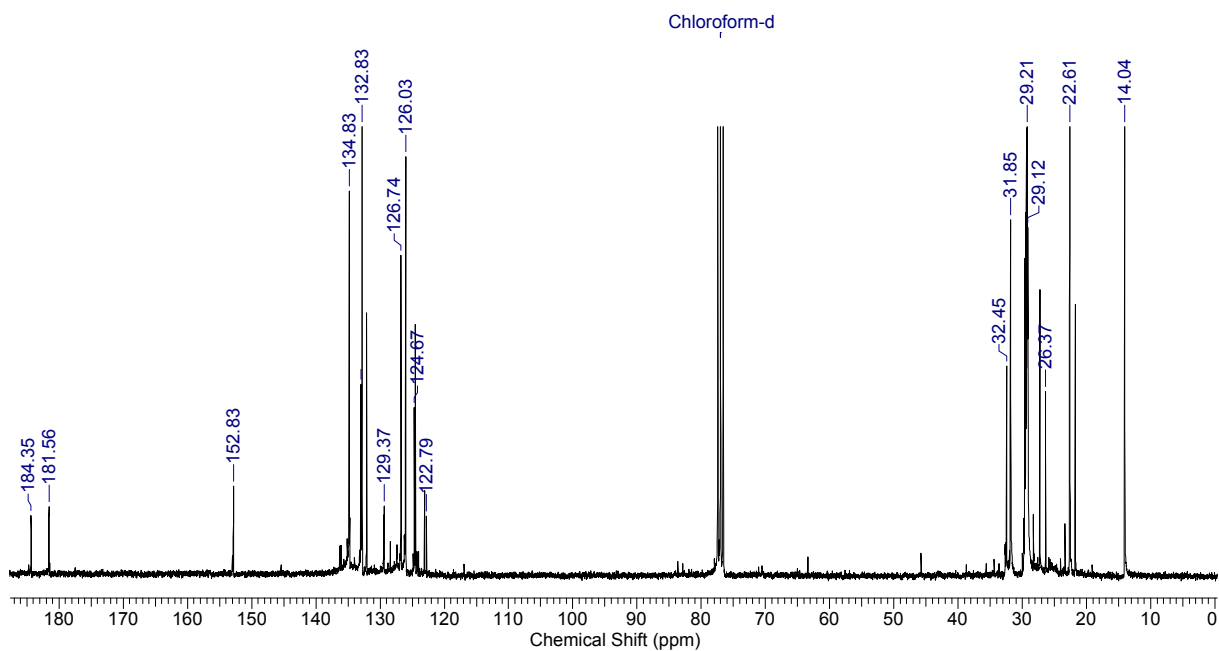

<sup>13</sup>C NMR (300 MHz, CDCl<sub>3</sub>) compound **9a**.

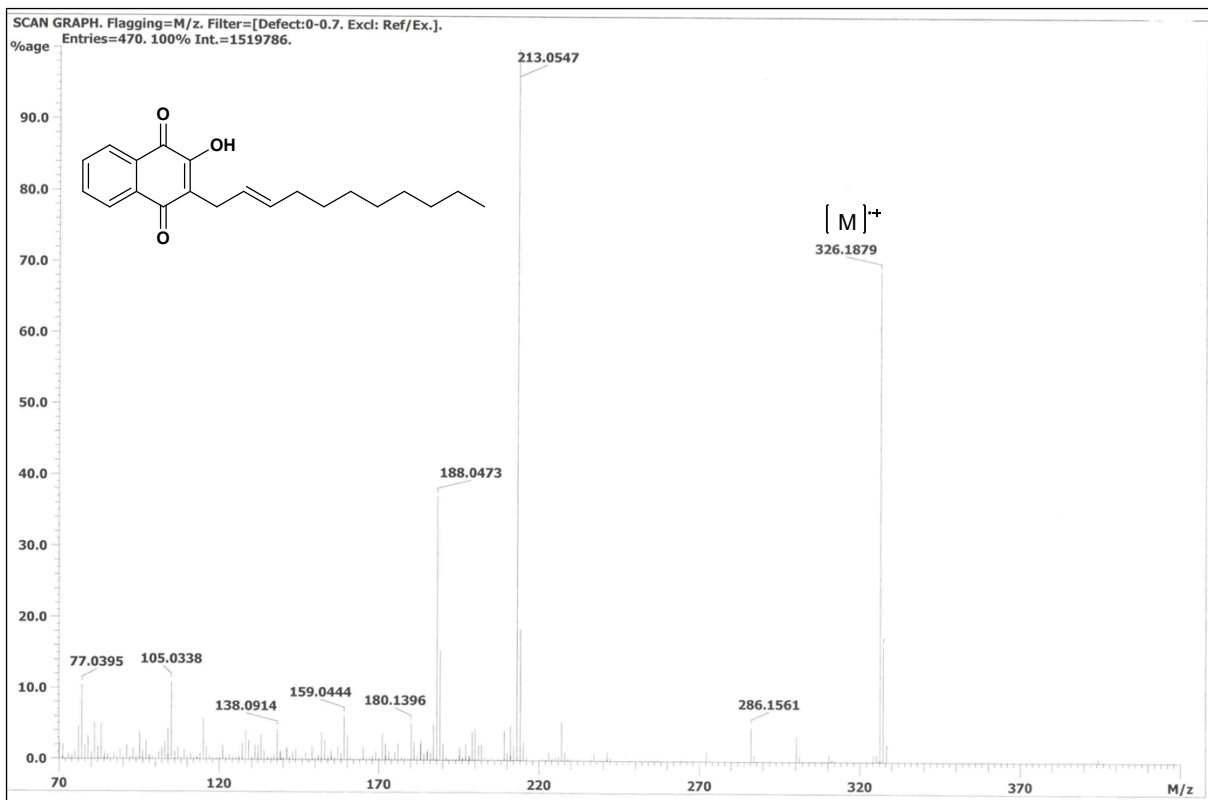

HRMS (EI) compound **9a**.

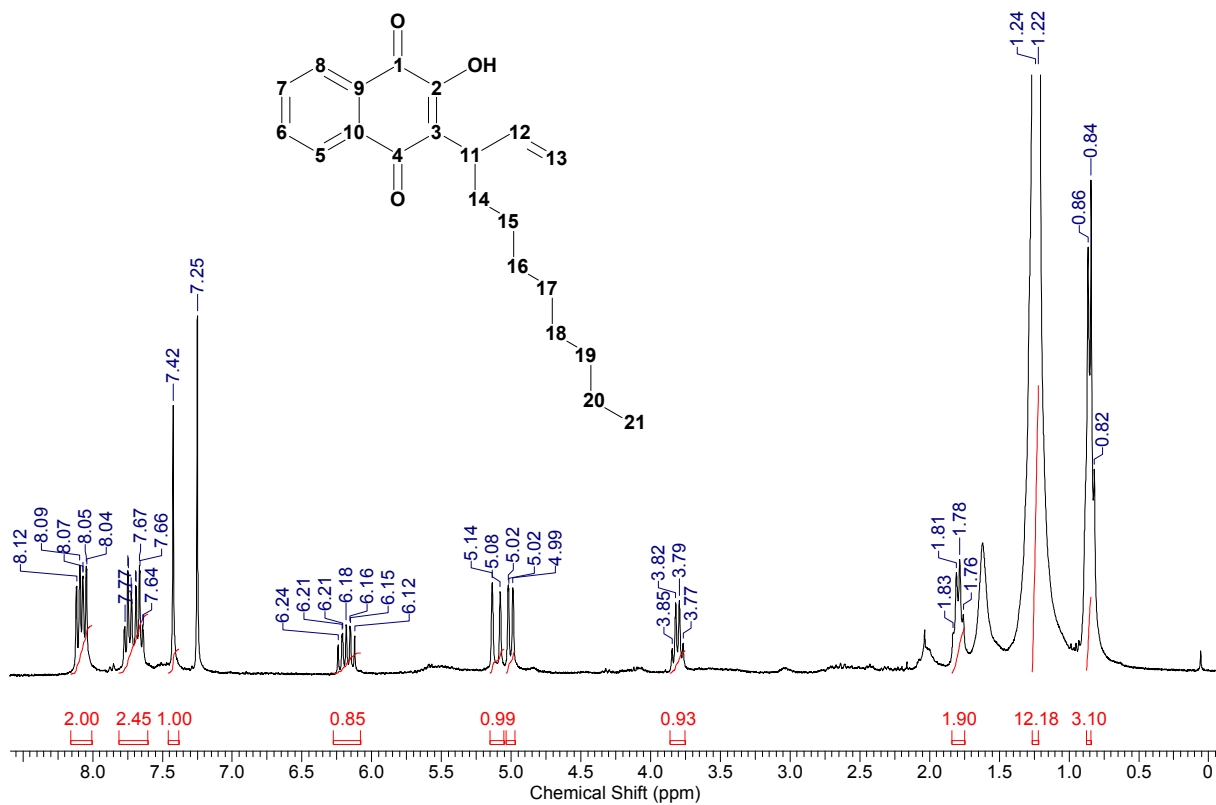

<sup>1</sup>H NMR (300 MHz, CDCl<sub>3</sub>) compound **9b**.

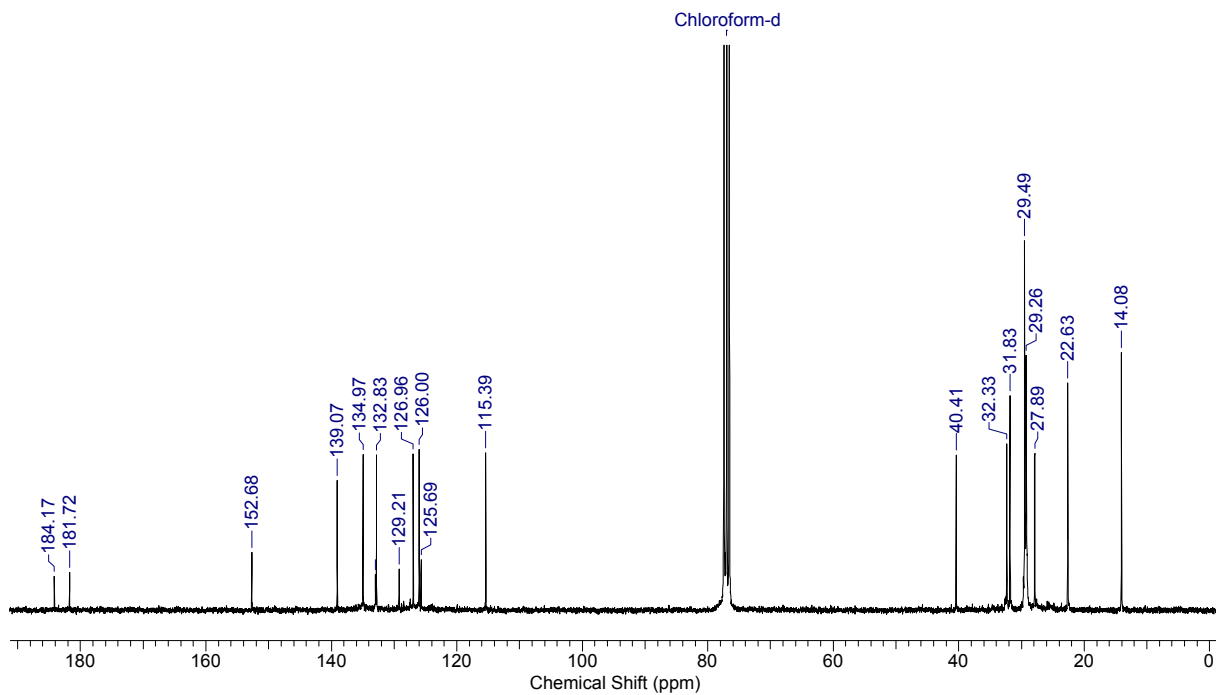

<sup>13</sup>C NMR (300 MHz, CDCl<sub>3</sub>) compound **9b**.



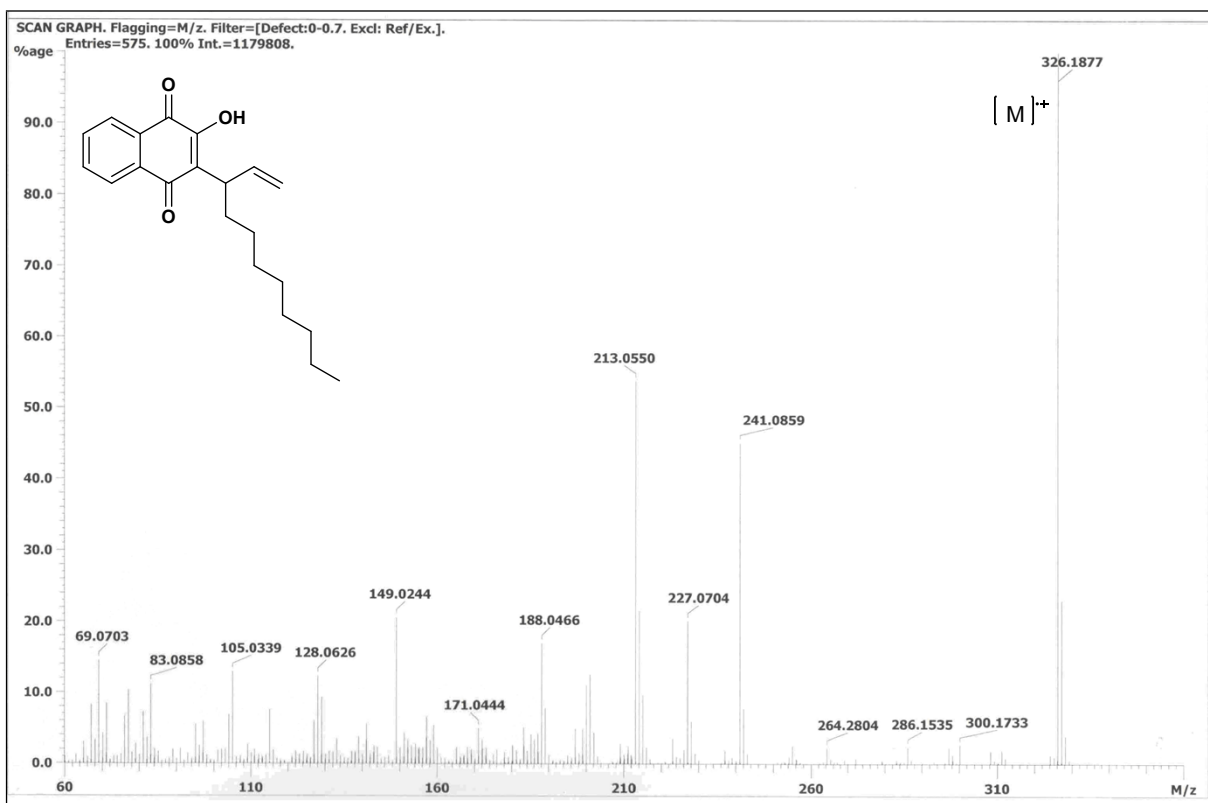

HRMS (EI) compound **9b**.

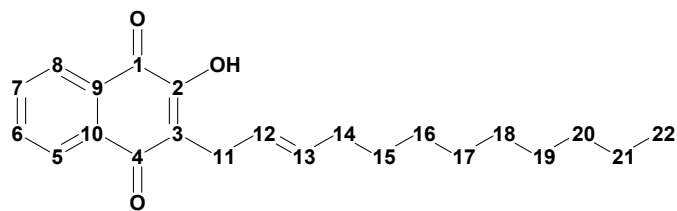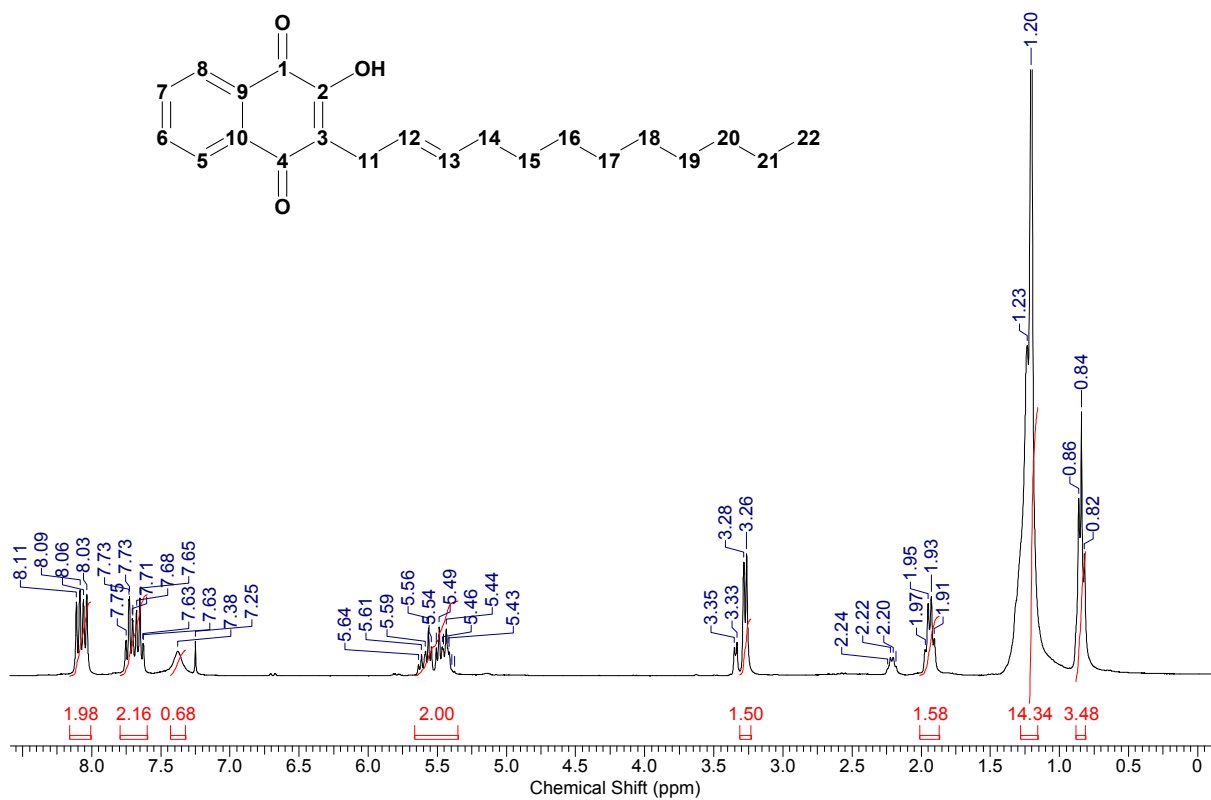

<sup>1</sup>H NMR (300 MHz, CDCl<sub>3</sub>) compound **10a**.

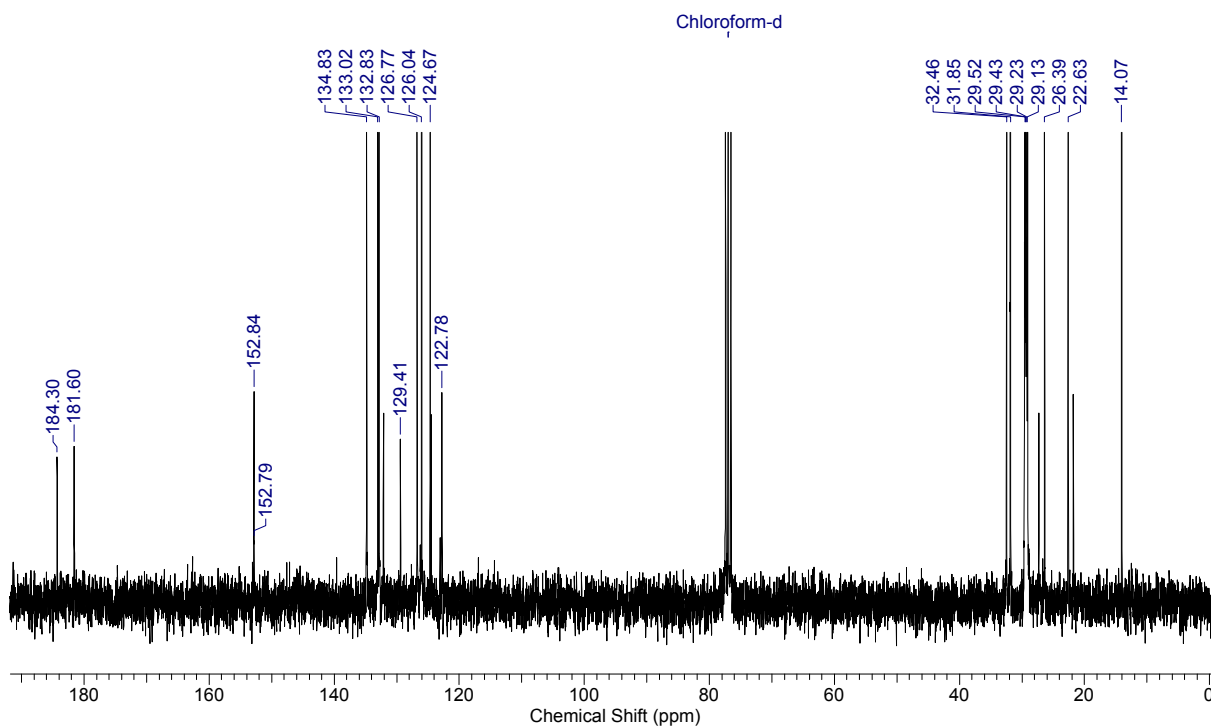

<sup>13</sup>C NMR (300 MHz, CDCl<sub>3</sub>) compound **10a**.

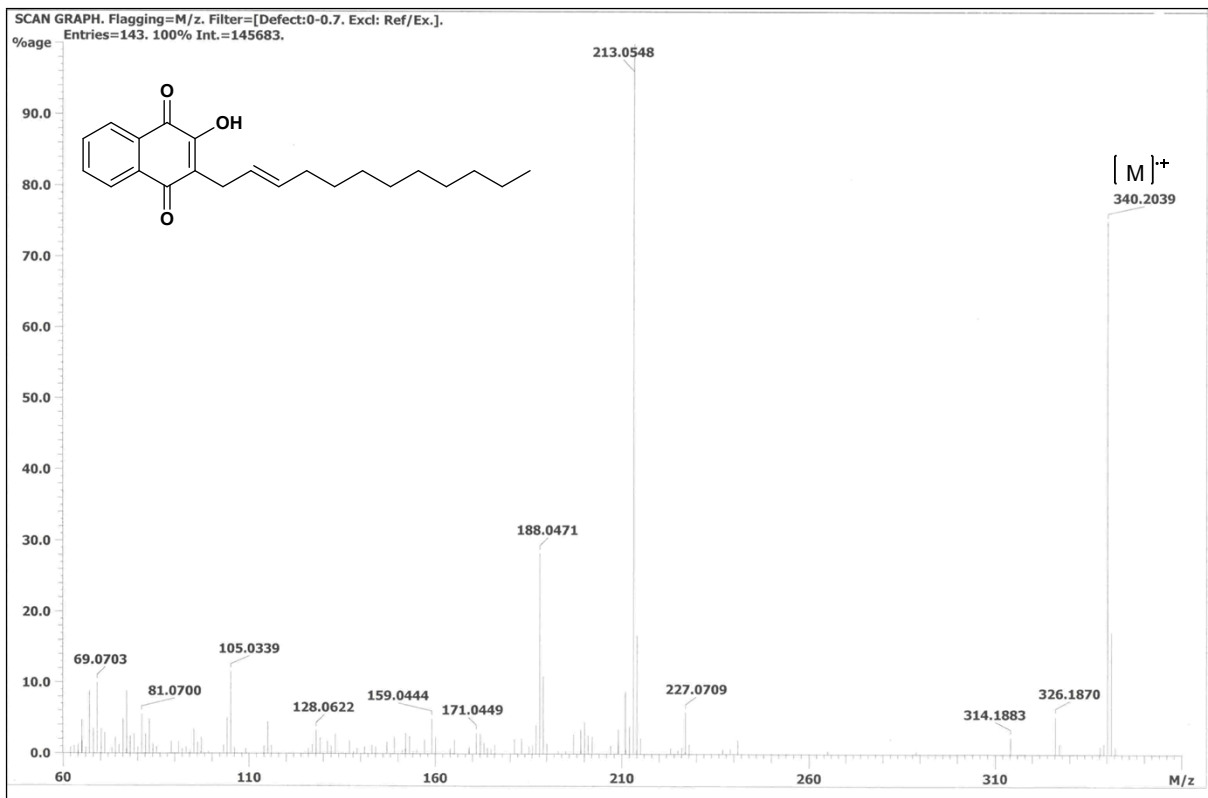

HRMS (EI) compound **10a**.

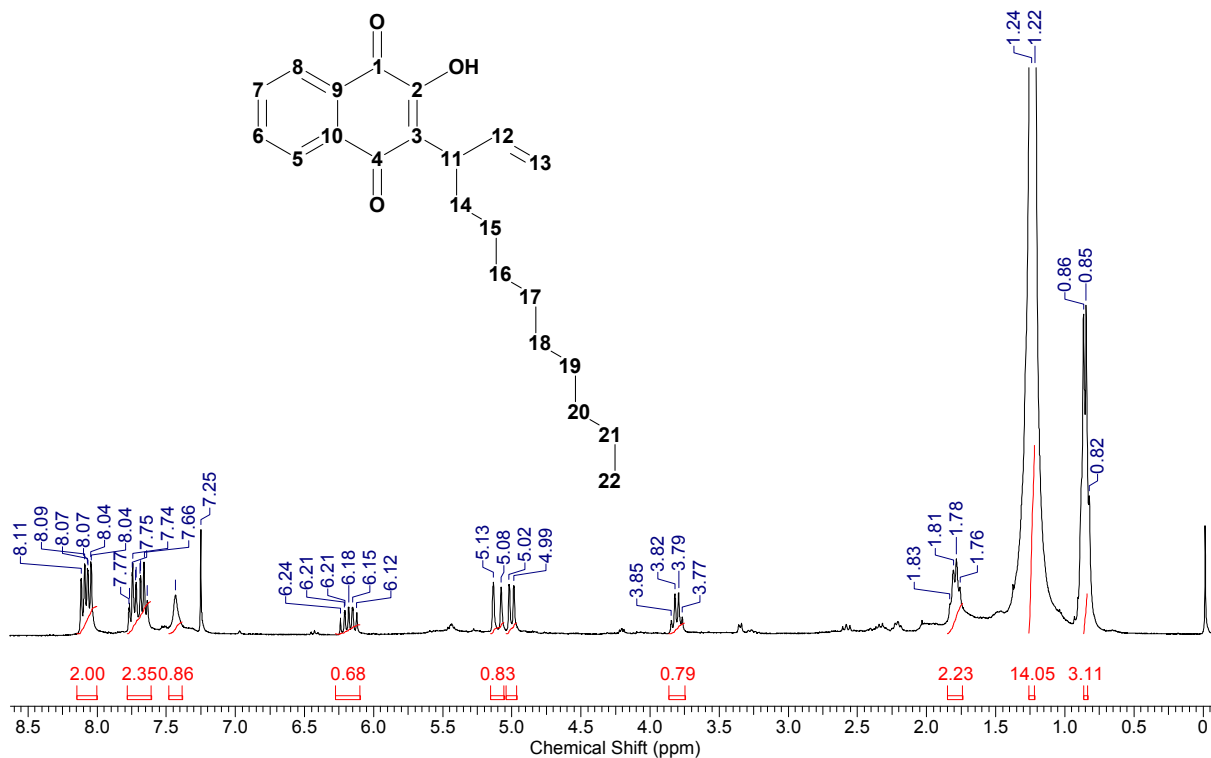

<sup>1</sup>H NMR (300 MHz, CDCl<sub>3</sub>) compound **10b**.

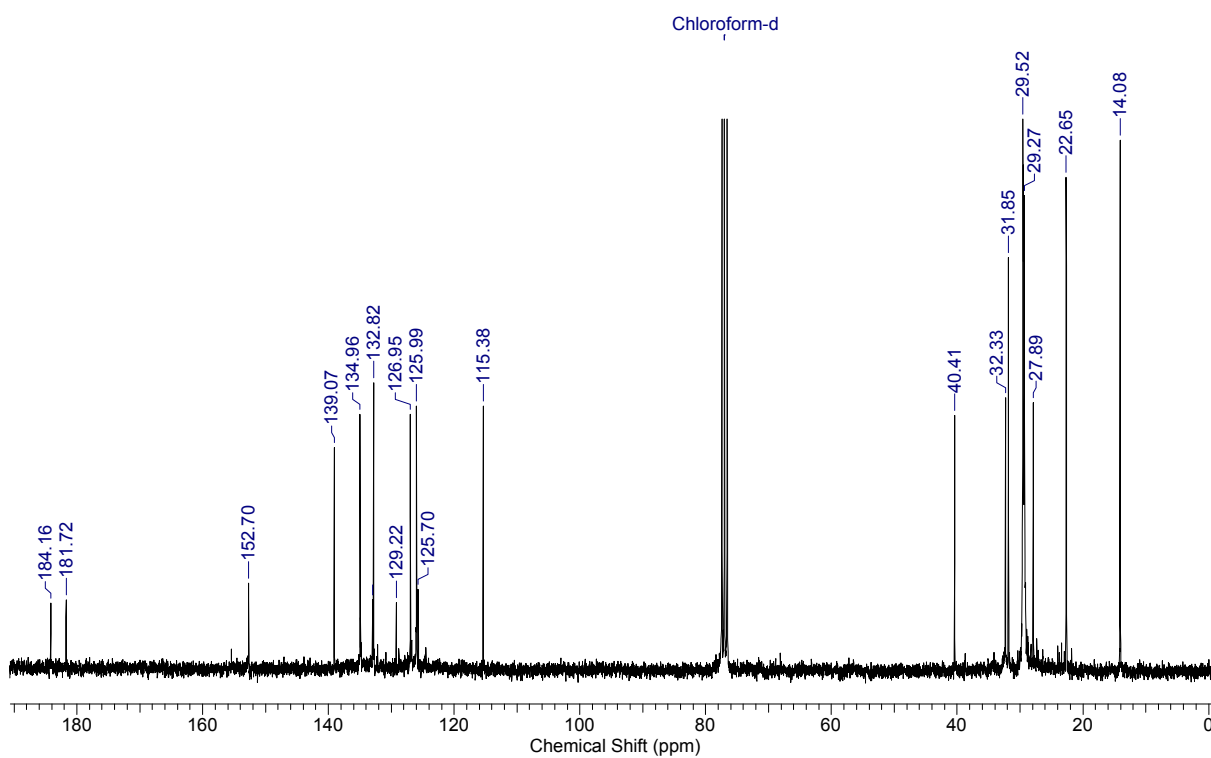

<sup>13</sup>C NMR (300 MHz, CDCl<sub>3</sub>) compound **10b**.

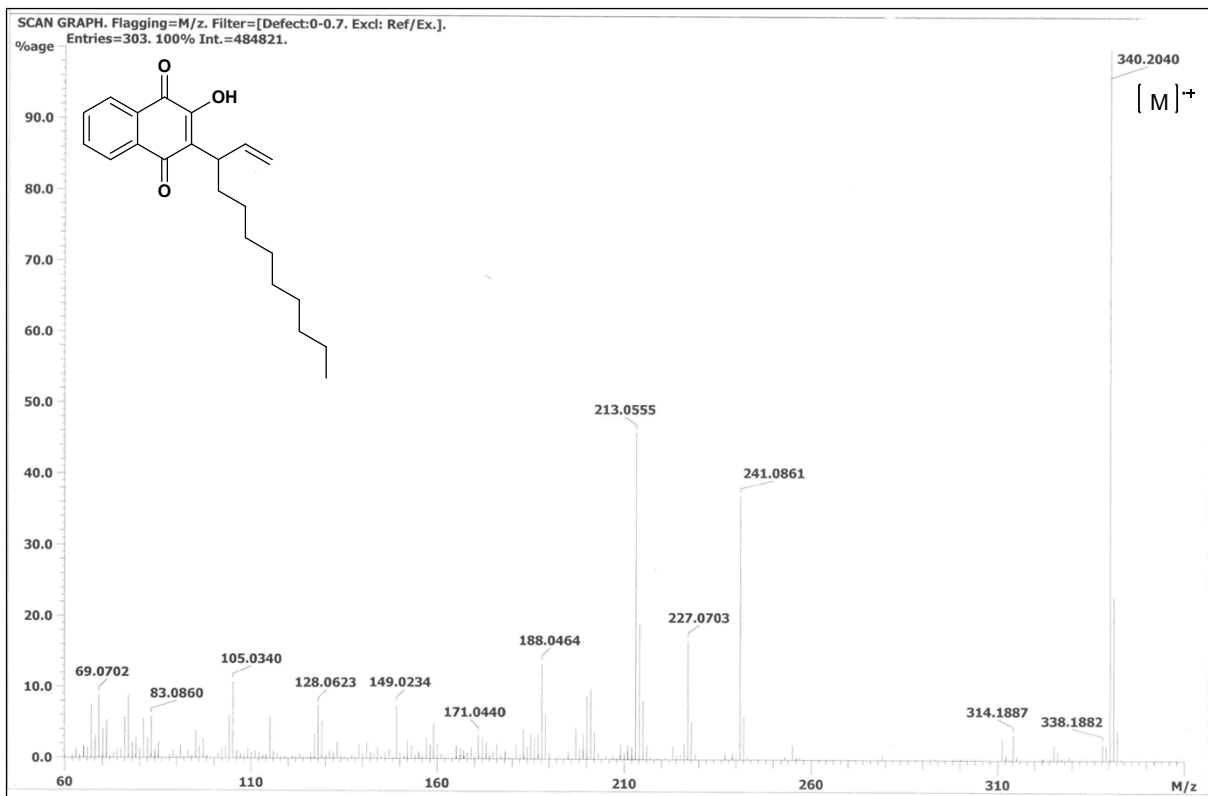

HRMS (EI) compound **10b**.

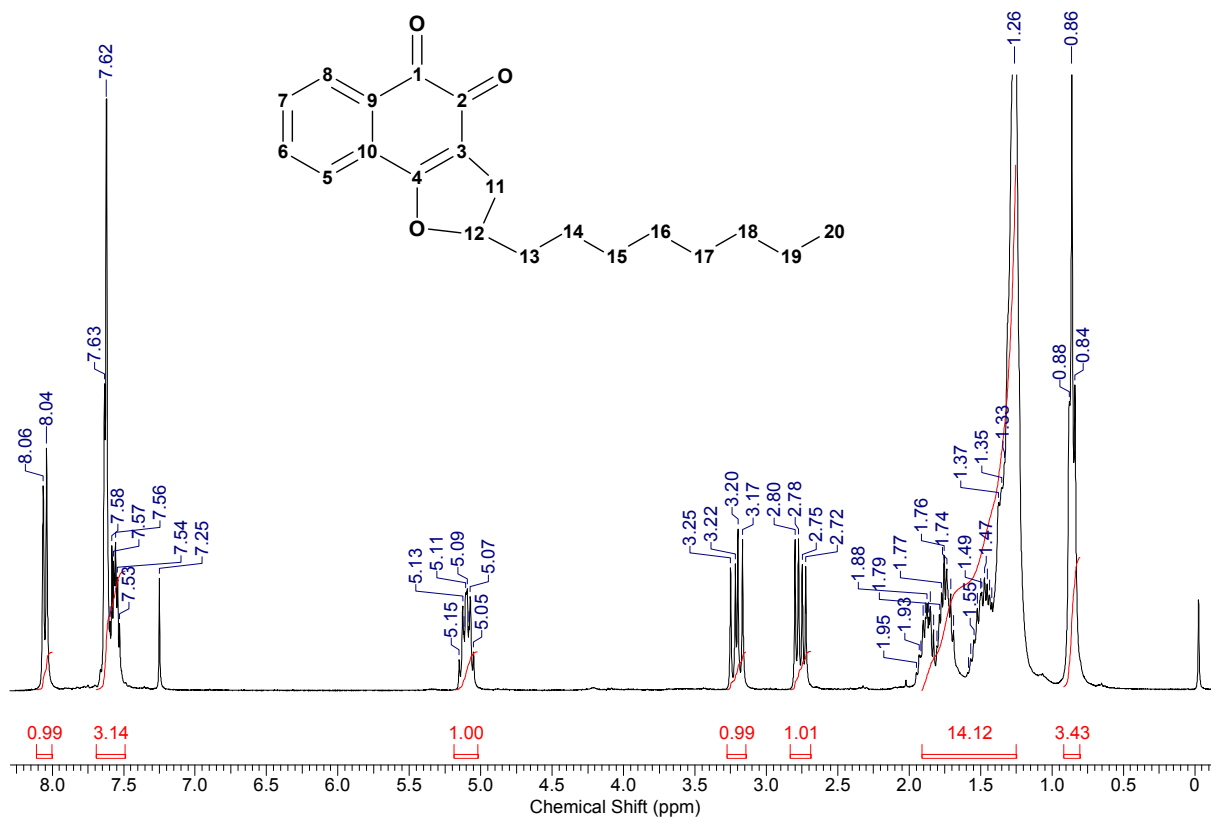

<sup>1</sup>H NMR (300 MHz, CDCl<sub>3</sub>) compound **11a**.

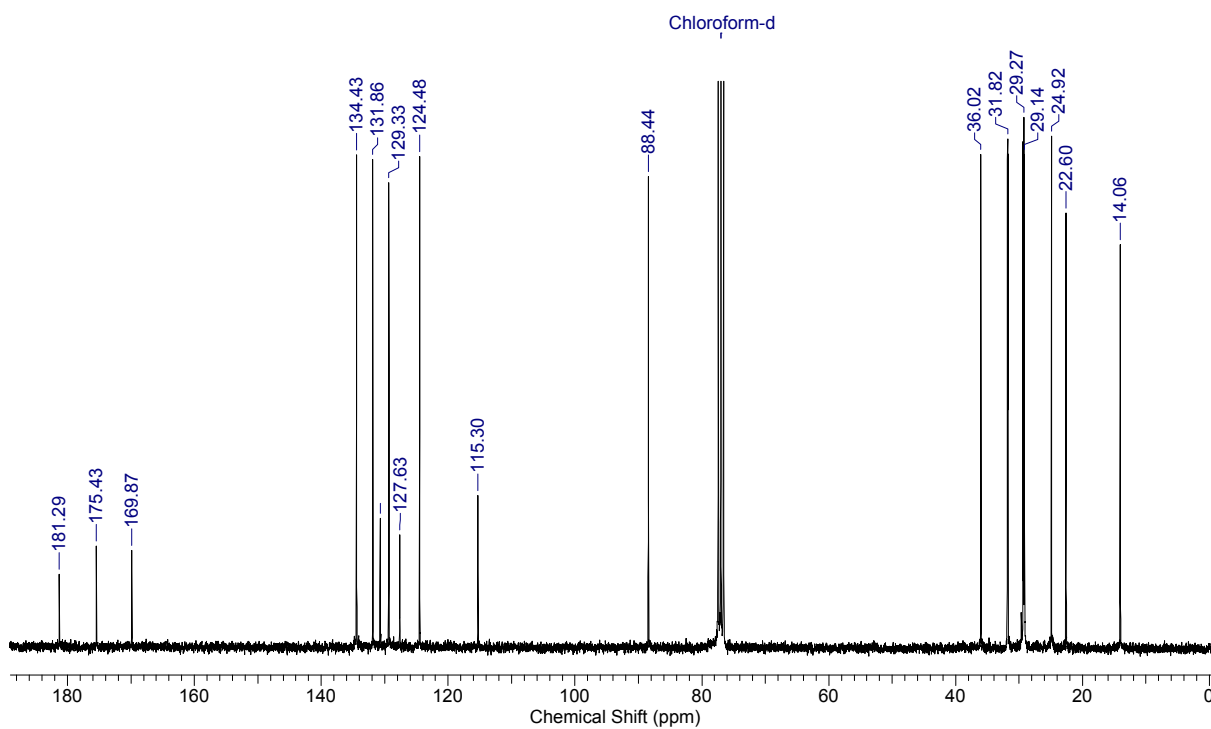

<sup>13</sup>C NMR (300 MHz, CDCl<sub>3</sub>) compound **11a**.

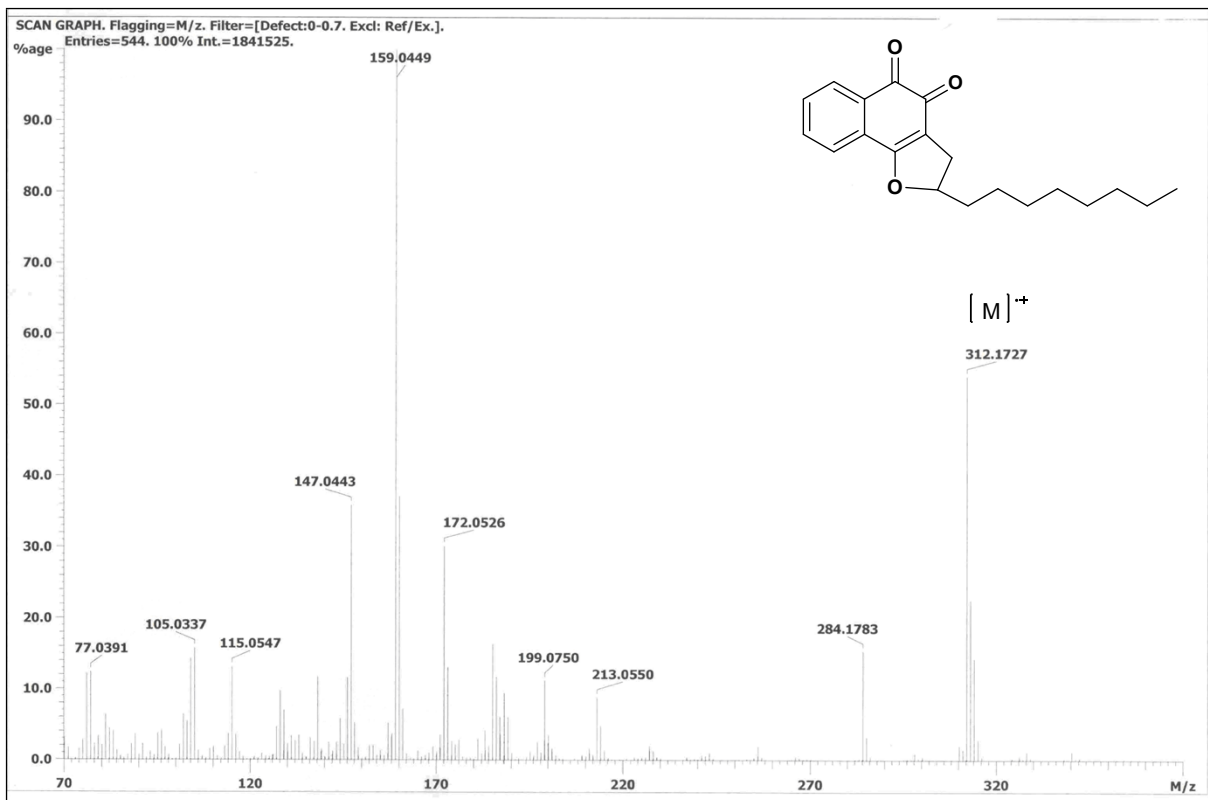

HRMS (EI) compound **11a**.

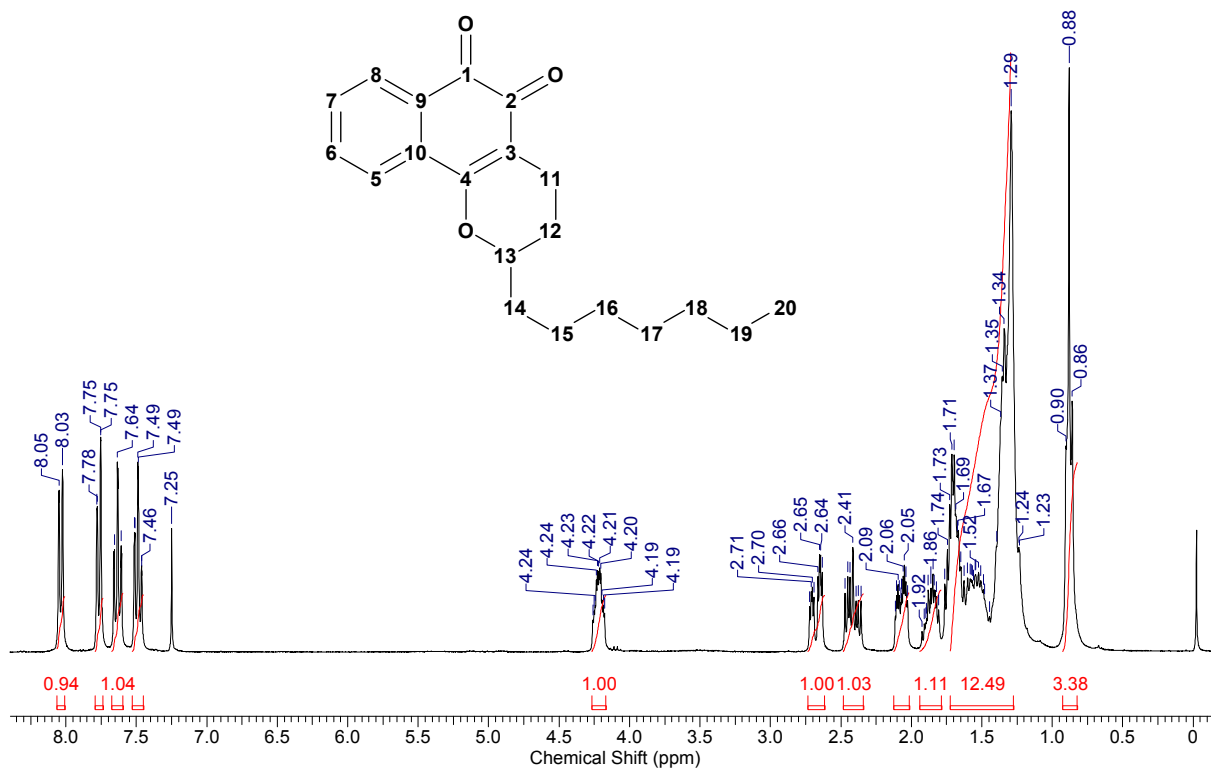

<sup>1</sup>H NMR (300 MHz, CDCl<sub>3</sub>) compound **11b**.

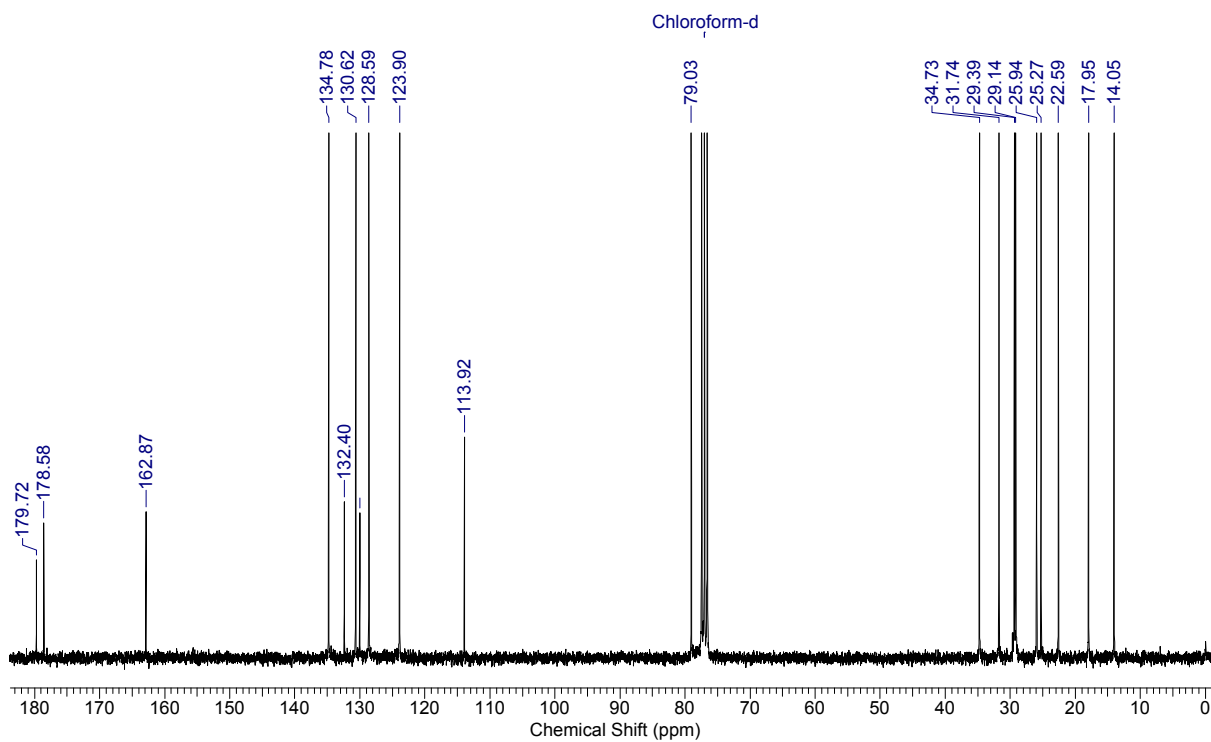

<sup>13</sup>C NMR (300 MHz, CDCl<sub>3</sub>) compound **11b**.



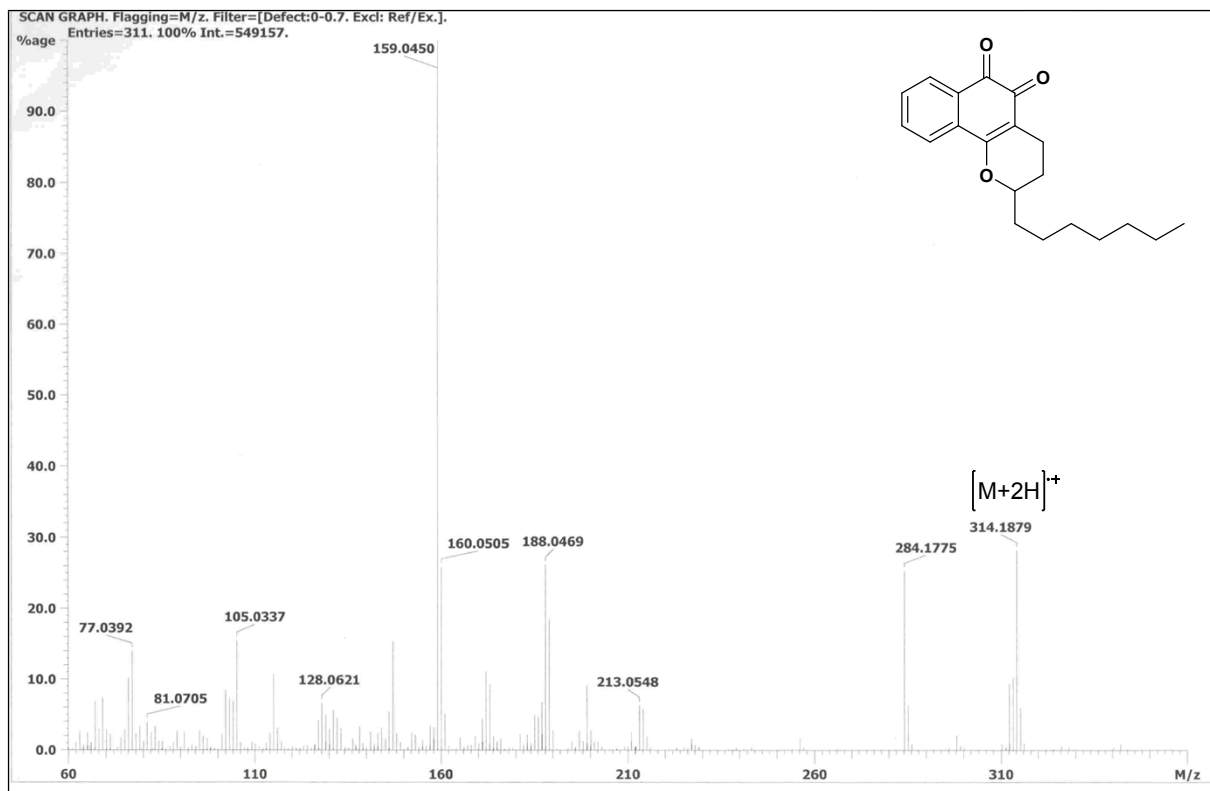

HRMS (EI) compound **11b**.

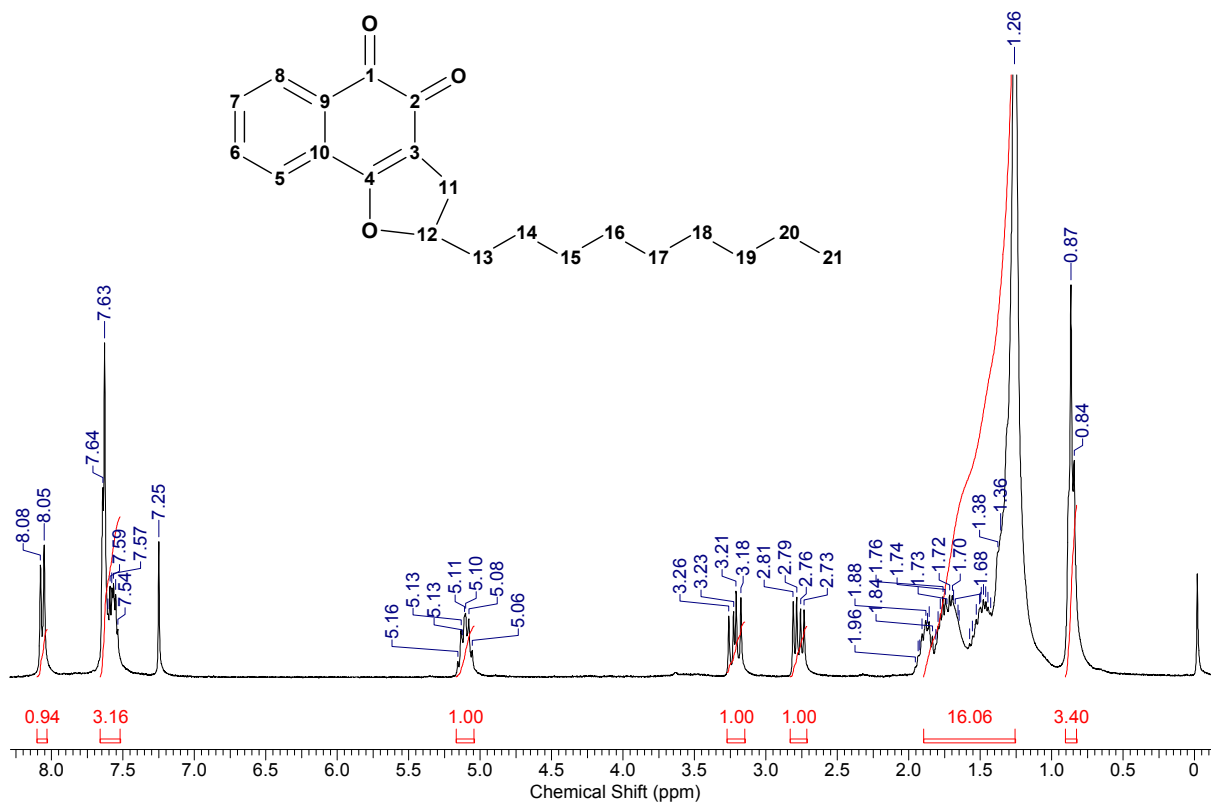

<sup>1</sup>H NMR (300 MHz, CDCl<sub>3</sub>) compound 12a.

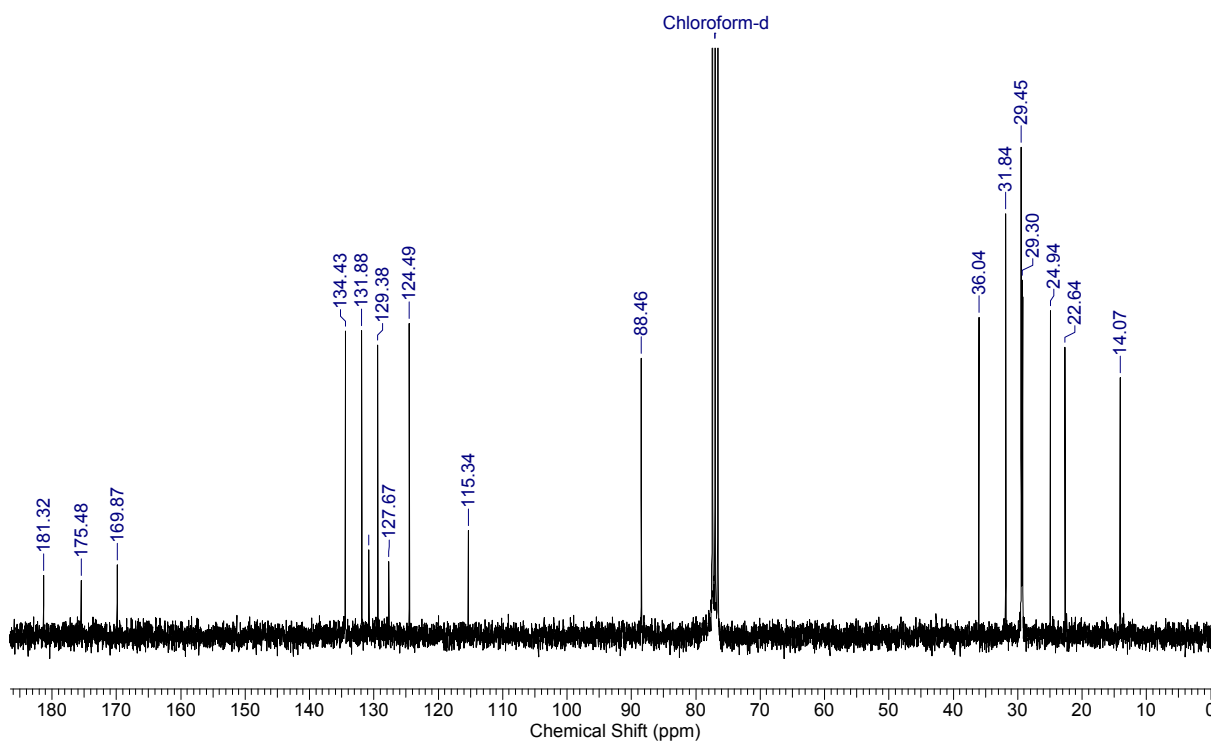

<sup>13</sup>C NMR (300 MHz, CDCl<sub>3</sub>) compound 12a.

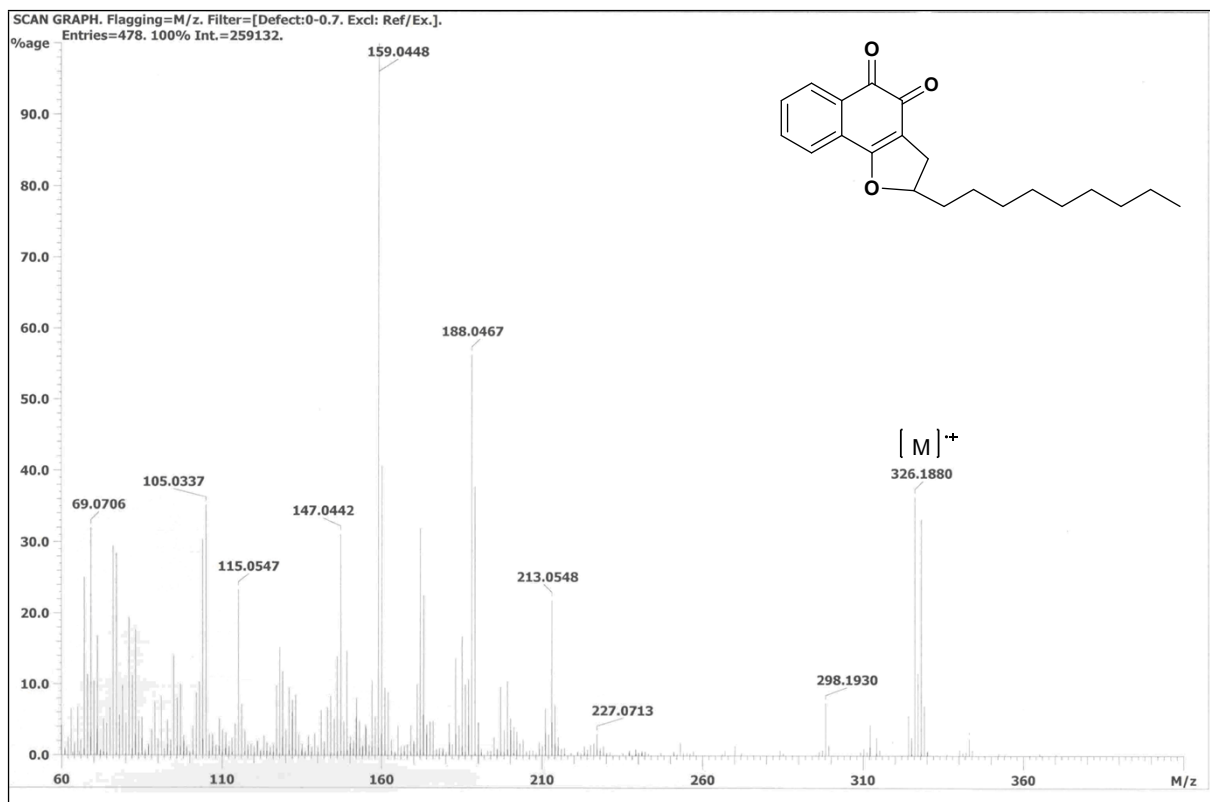

HRMS (EI) compound **12a**.

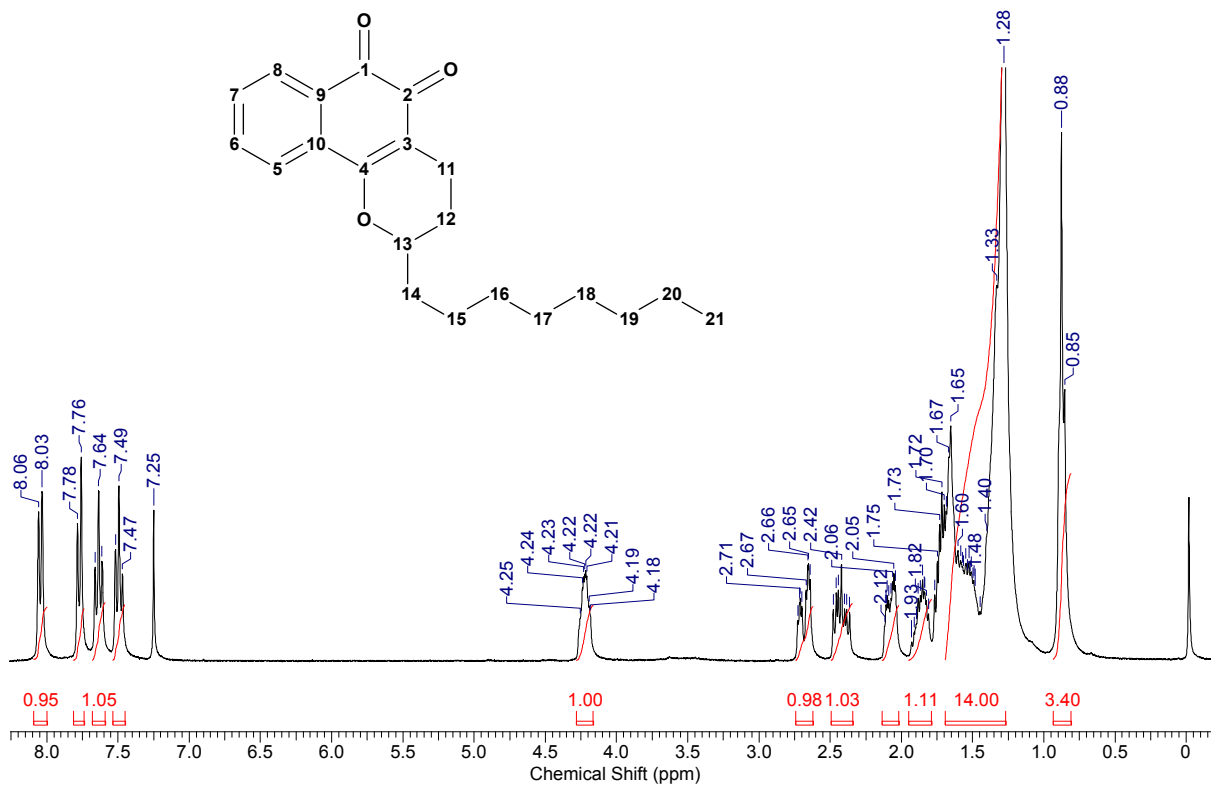

<sup>1</sup>H NMR (300 MHz, CDCl<sub>3</sub>) compound **12b**.

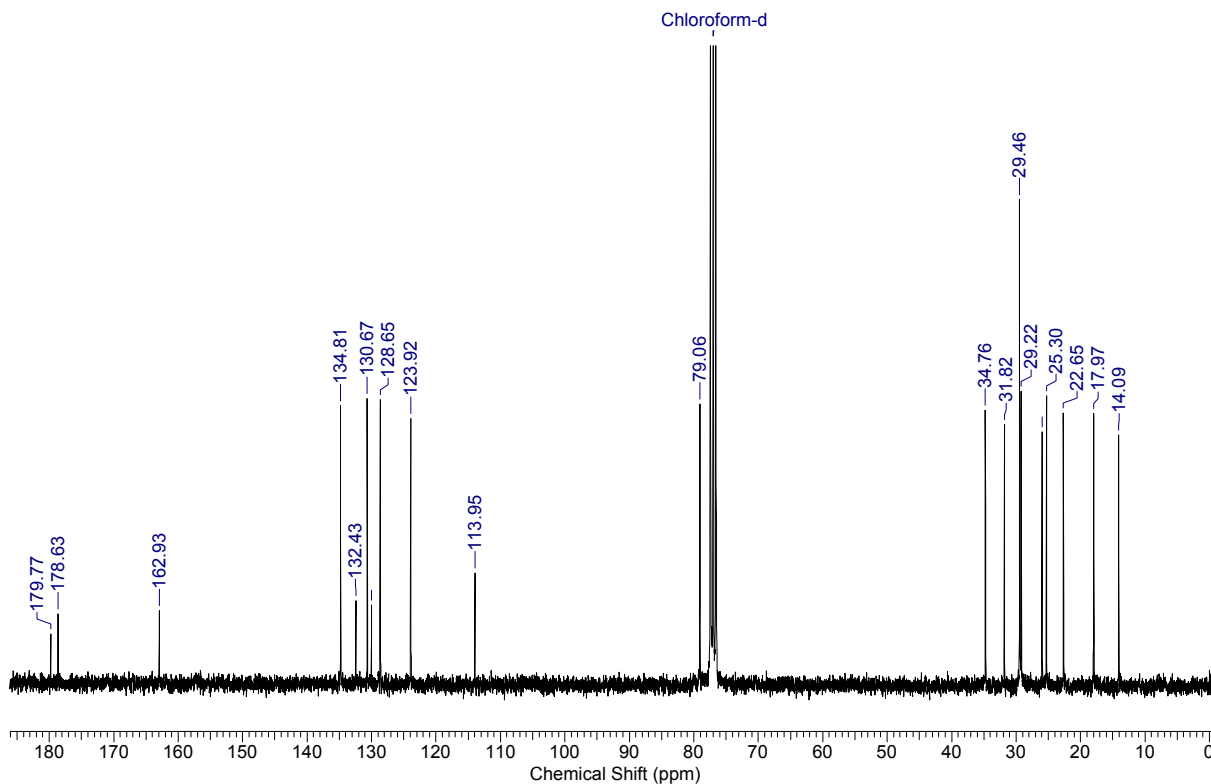

<sup>13</sup>C NMR (300 MHz, CDCl<sub>3</sub>) compound **12b**.

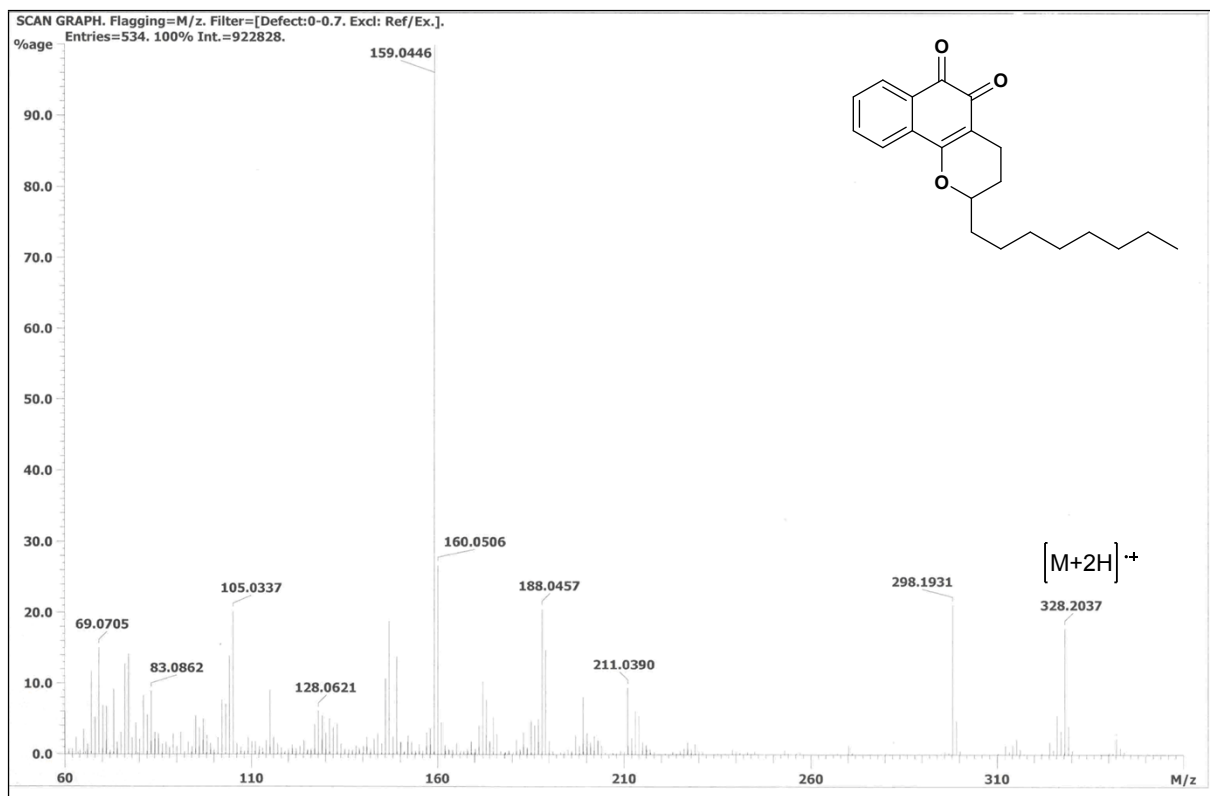

HRMS (EI) compound **12b**.

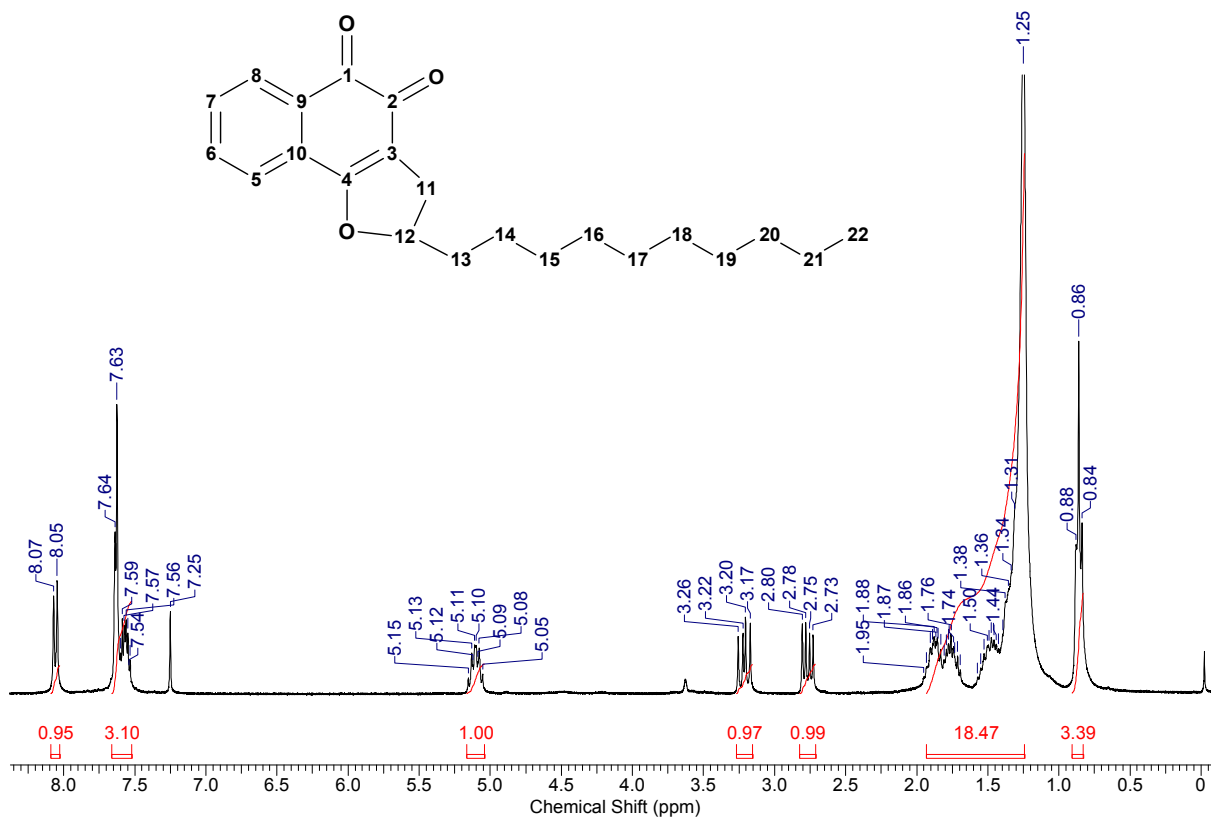

$^1\text{H}$  NMR (300 MHz,  $\text{CDCl}_3$ ) compound **13a**.

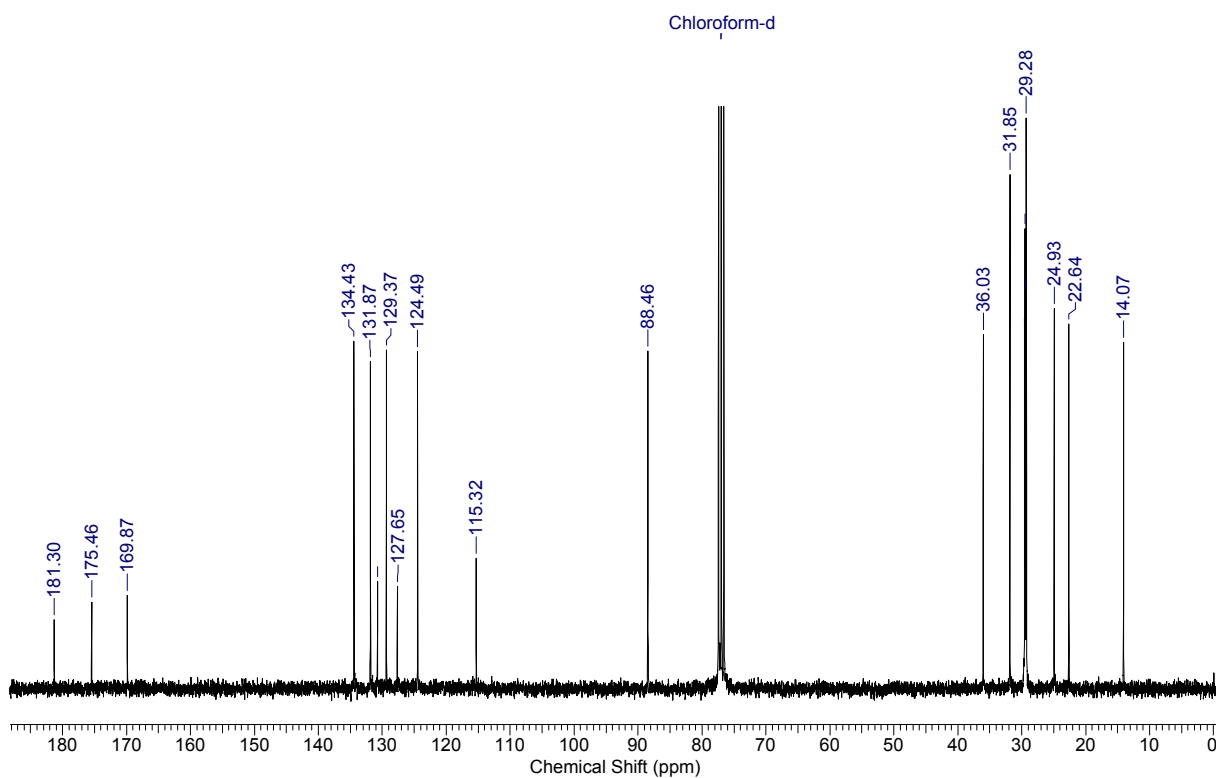

$^{13}\text{C}$  NMR (300 MHz,  $\text{CDCl}_3$ ) compound **13a**.

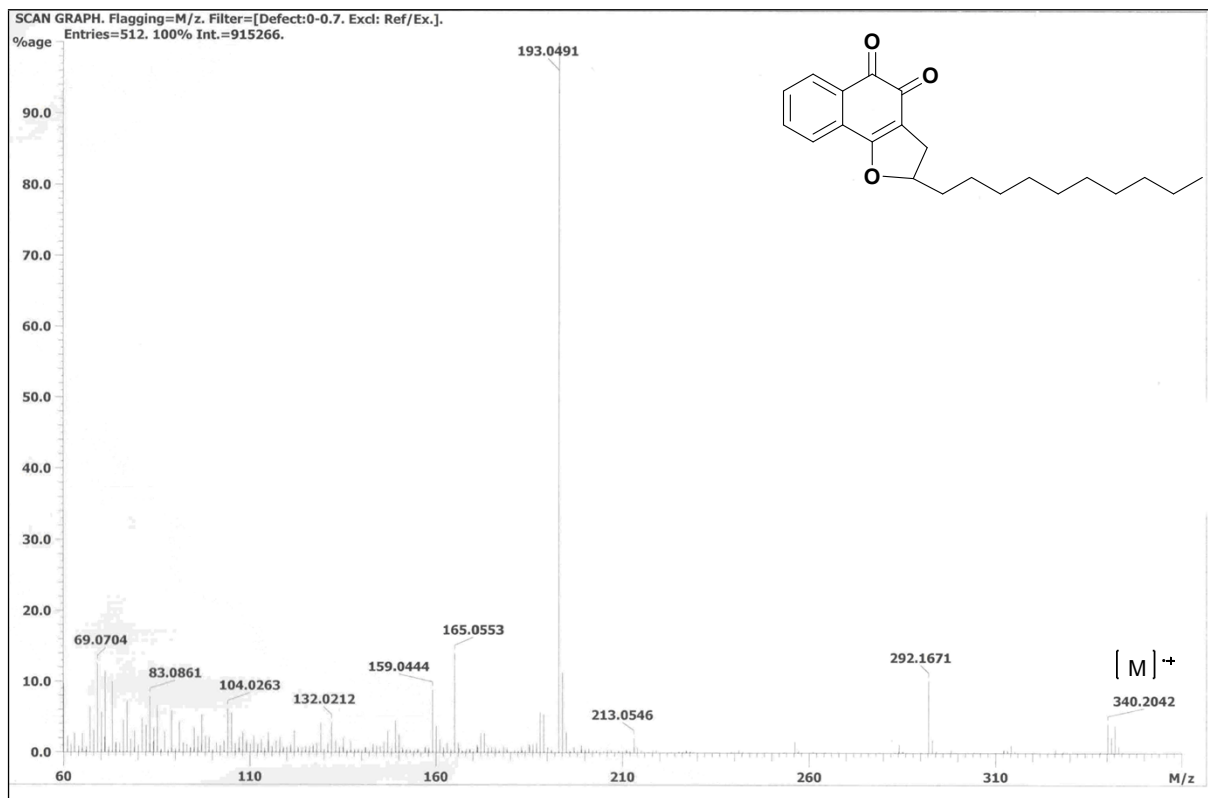

HRMS (EI) compound **13a**.

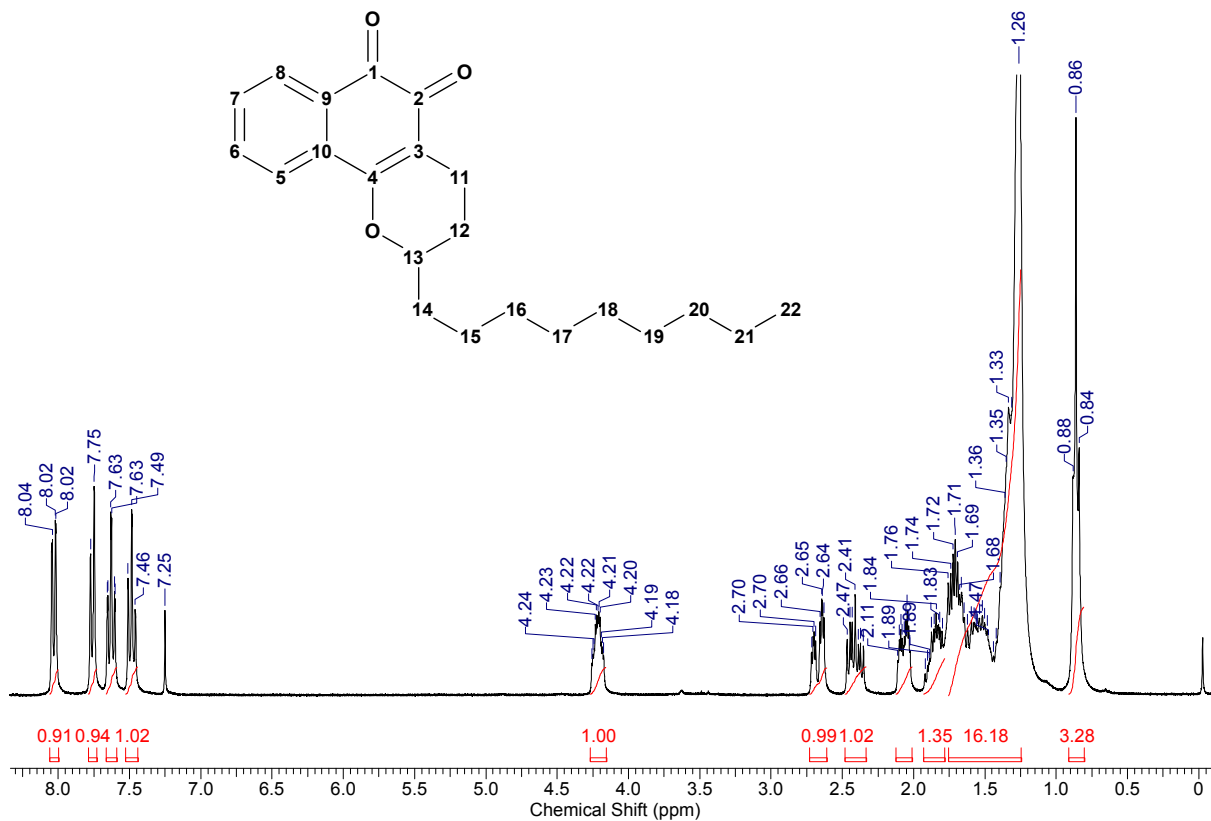

$^1\text{H}$  NMR (300 MHz,  $\text{CDCl}_3$ ) compound **13b**.

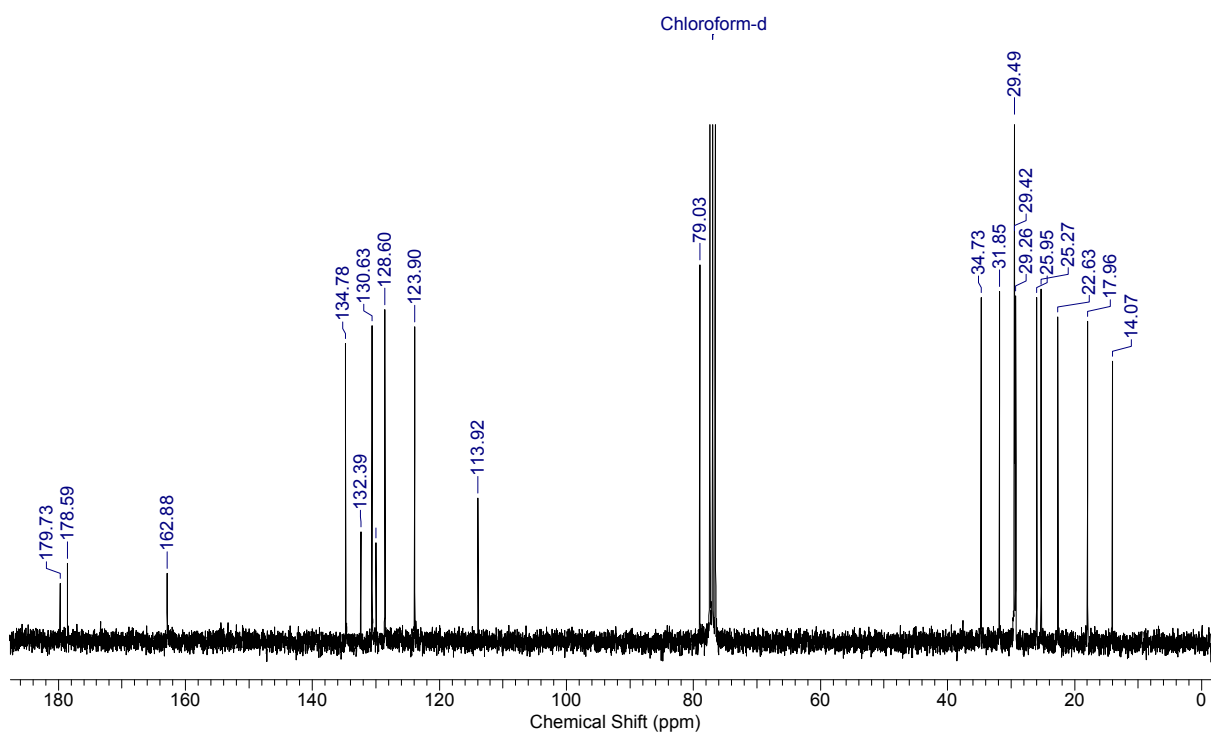

$^{13}\text{C}$  NMR (300 MHz,  $\text{CDCl}_3$ ) compound **13b**.



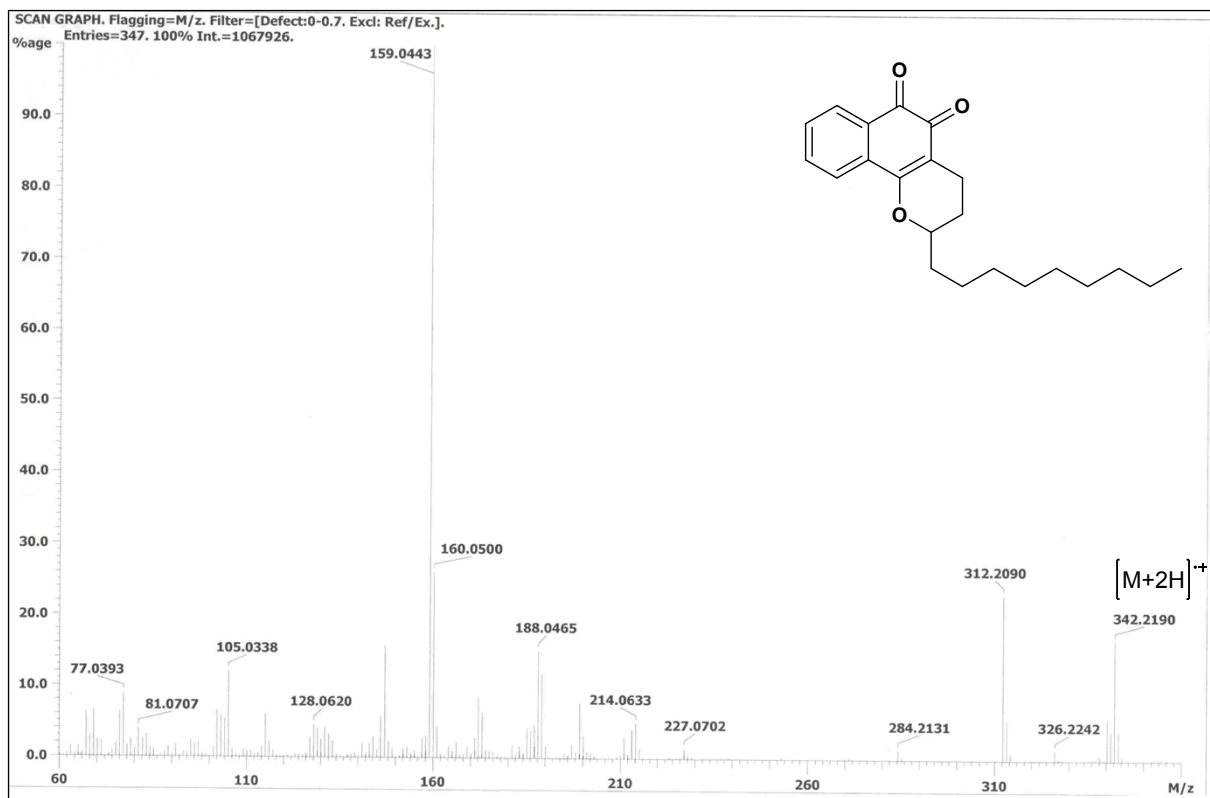

HRMS (EI) compound **13b**.
